# Supplementary material for: The OpdQ porin of Pseudomonas aeruginosa is regulated by environmental signals associated with cystic fibrosis including nitrate‐induced regulation involving the NarXL two‐component system
Source: PubMed Central journal article supplement (PMC4694141; doi:10.1002/mbo3.305), 2015-10-12

A

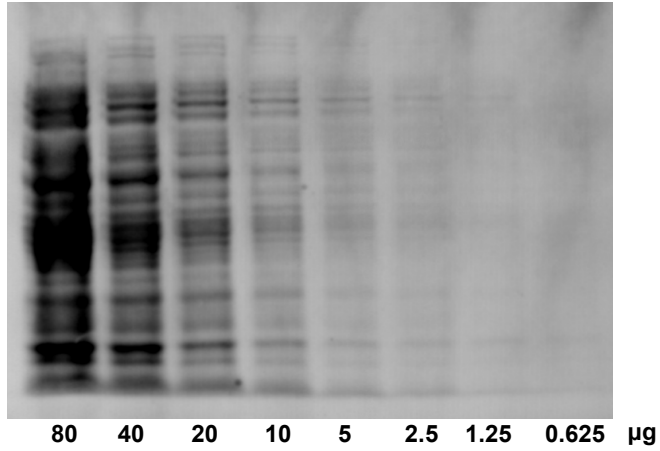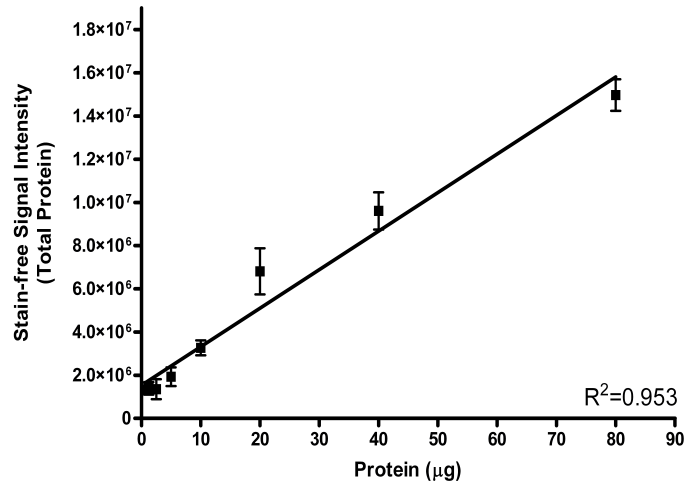

B

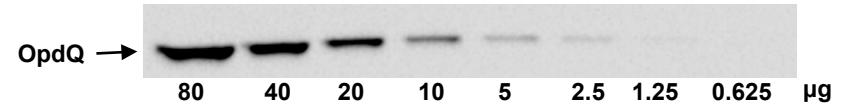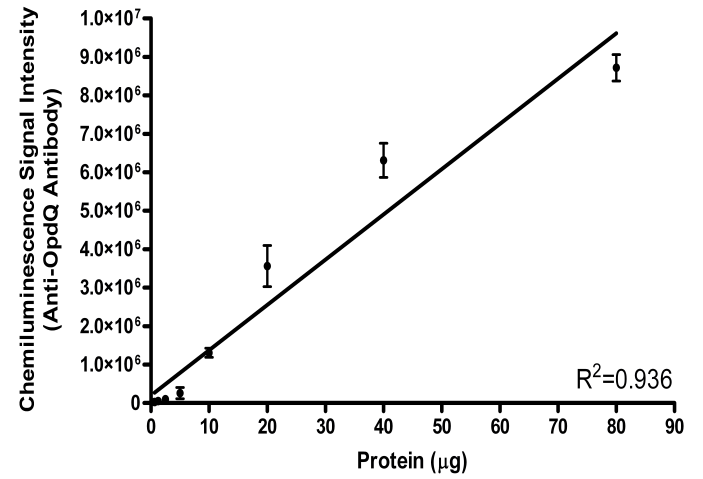

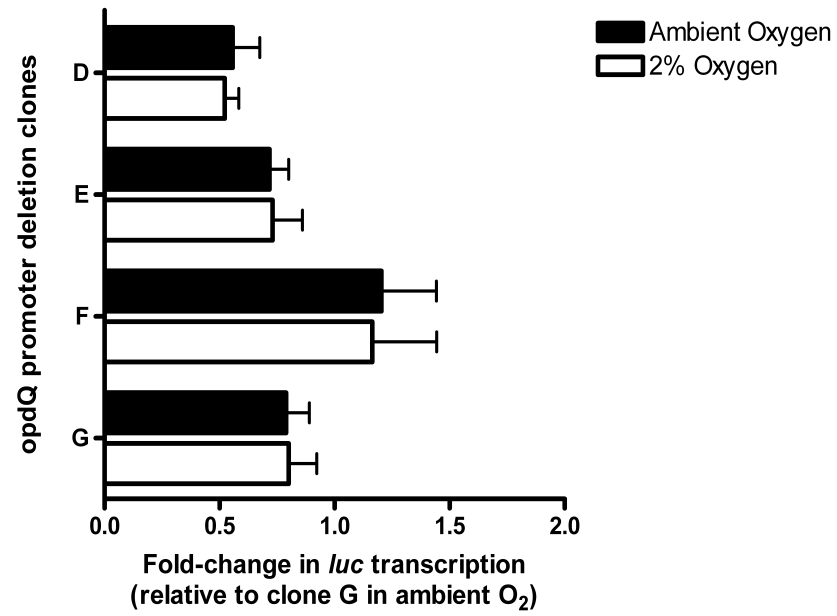

# Ambient O<sub>2</sub>

**A**

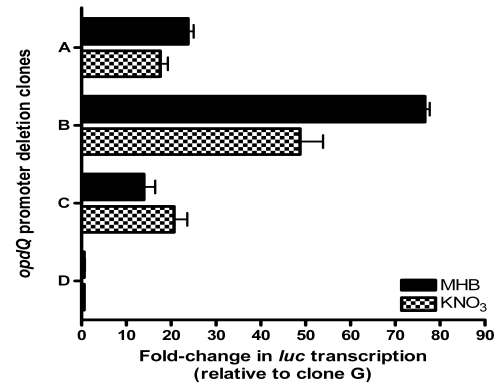

**B**

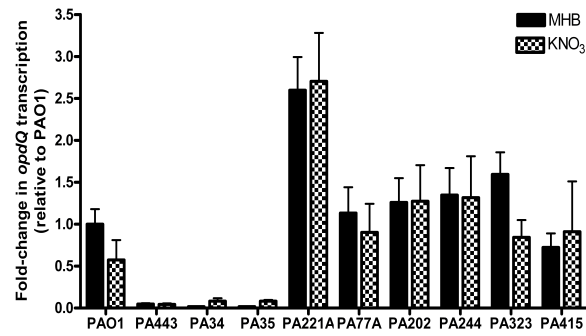

**C**

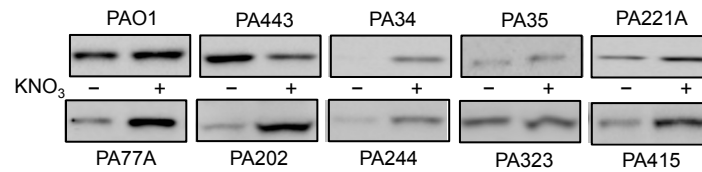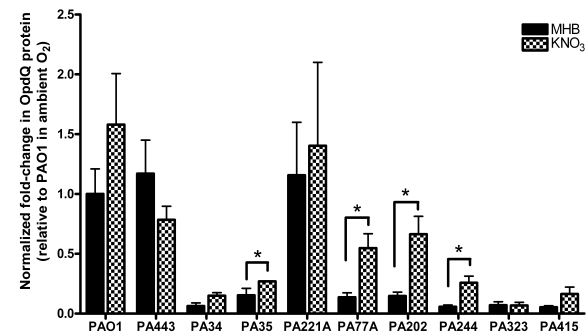

# Ambient O<sub>2</sub>

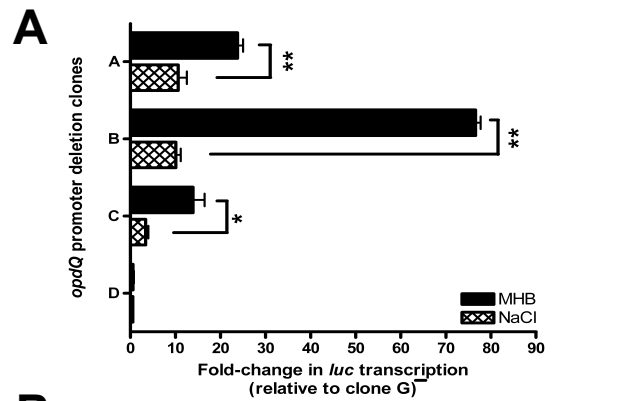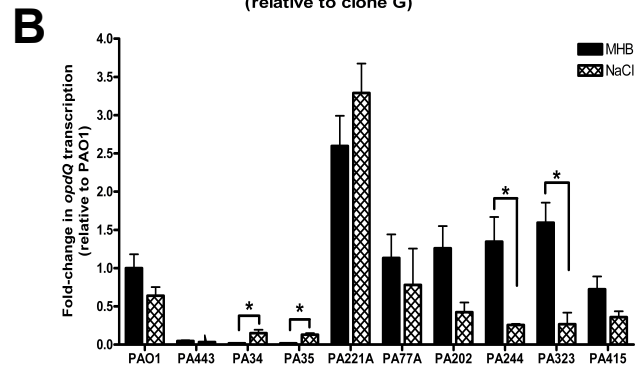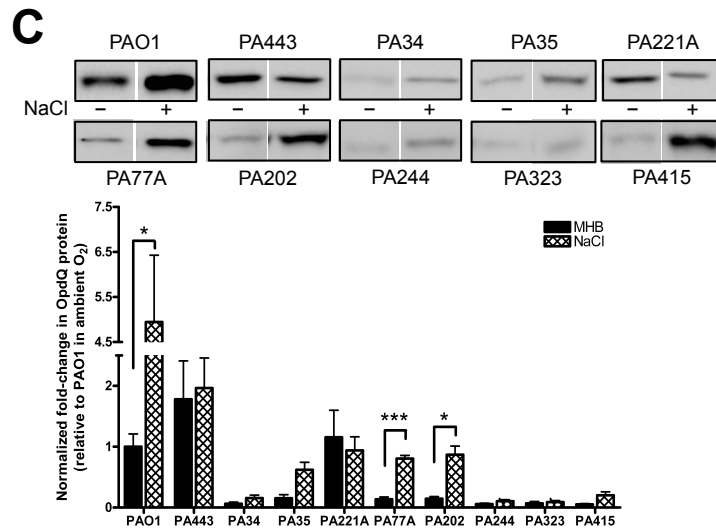



# Ambient O<sub>2</sub>

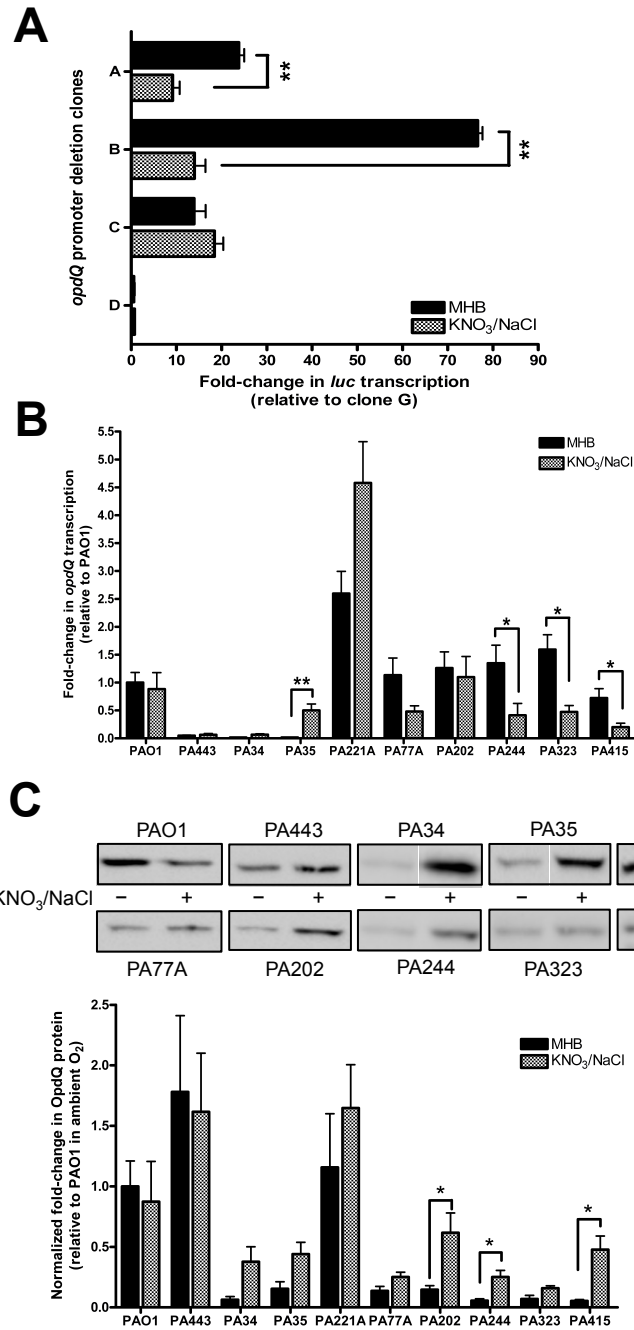

Supplement: MBO3-4-0967-s001.pdf [file MBO3-4-0967-s001.pdf]
